# Supplementary material
Source: Royal Society of Chemistry journal article supplement (doi:10.1039/d6ta00623j)
Supplement: d6ta00623j1.pdf [file d6ta00623j1.pdf]

## Supplementary Information

### Giant electrocaloric response in thiourea under low electric field in the cryogenic region.

Juan Manuel Bermúdez-García,<sup>a†\*</sup> Susana Yáñez-Vilar,<sup>b†</sup> Ángel Ferradanes-Martínez,<sup>a</sup> Antonio Luis Llamas-Saiz,<sup>c</sup> Manuel Sánchez-Andújar,<sup>a</sup> Socorro Castro-García,<sup>a</sup> María Antonia Señarís-Rodríguez,<sup>a</sup> and Jorge Mira.<sup>b\*</sup>

\* e-mail: [j.bermudez@udc.es](mailto:j.bermudez@udc.es), [jorge.mira@usc.es](mailto:jorge.mira@usc.es)

† These authors have equally contributed to this work.

**a.** CICA–Centro Interdisciplinar de Química e Bioloxía and Departamento de Química, Facultade de Ciencias, Universidade da Coruña, 15071 A Coruña, Spain.

**b.** Departamento de Física Aplicada and Instituto de Materiais (iMATUS), Universidade de Santiago de Compostela, 15782, Santiago de Compostela, Spain

**c.** Research Infrastructures Area X-ray Unit, Universidade de Santiago de Compostela, 15782 Santiago de Compostela, Spain.

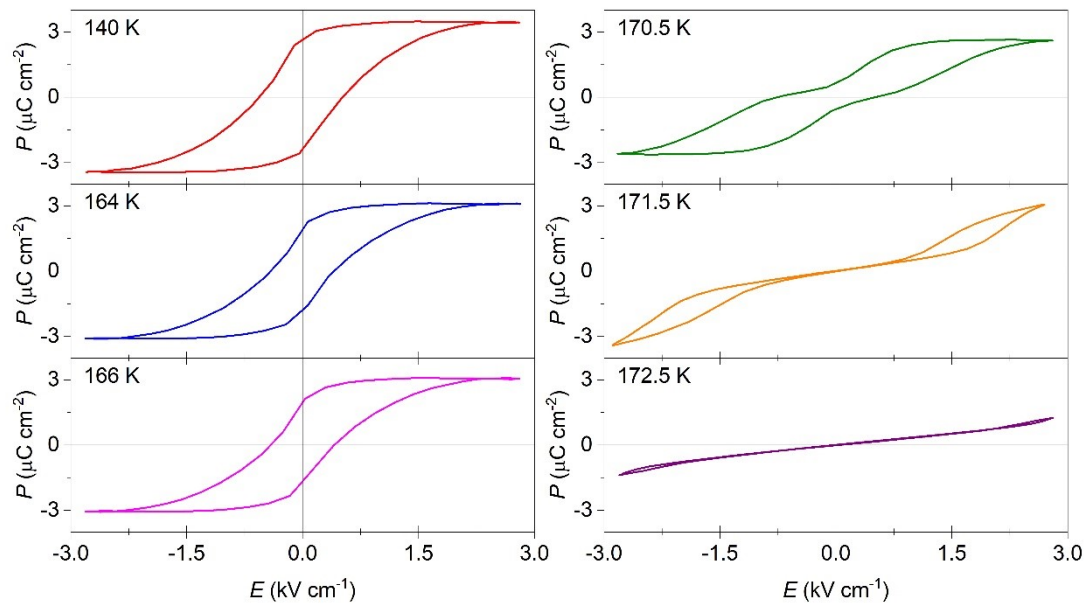

**Figure S1.** Selected polarization loops obtained at different temperatures below and above the transition temperature  $T_1$ .

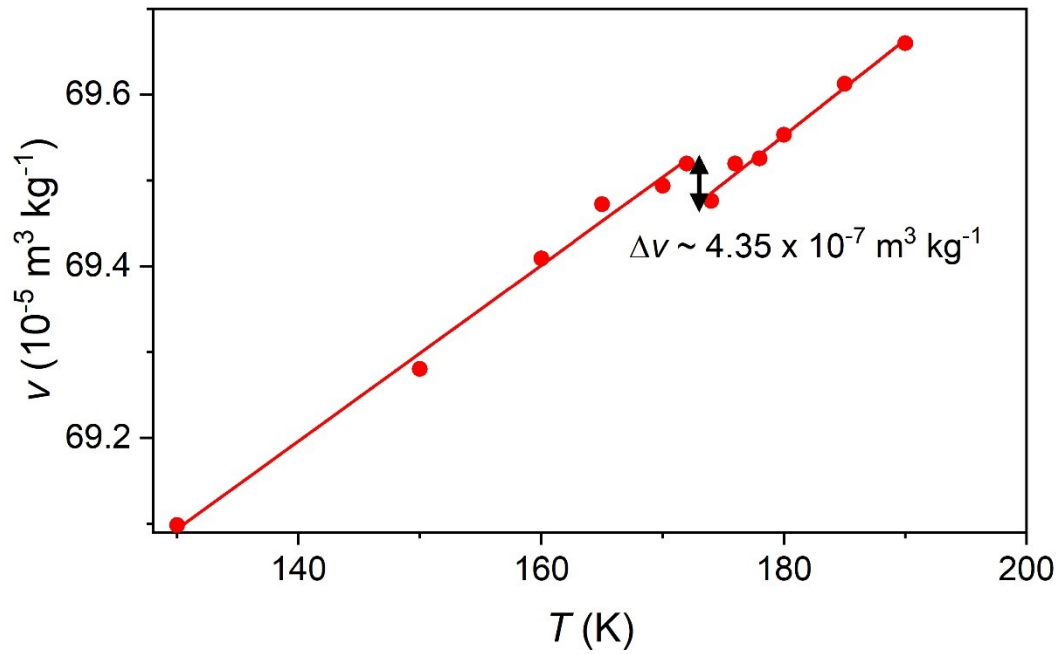

**Figure S2.** Specific volume as a function of temperature obtained by single crystal x-ray diffraction at different temperatures, highlighting a specific volume change of  $4.35 \times 10^{-7} \text{ m}^3 \text{ kg}^{-1}$  across the phase transition from phase I to phase II.

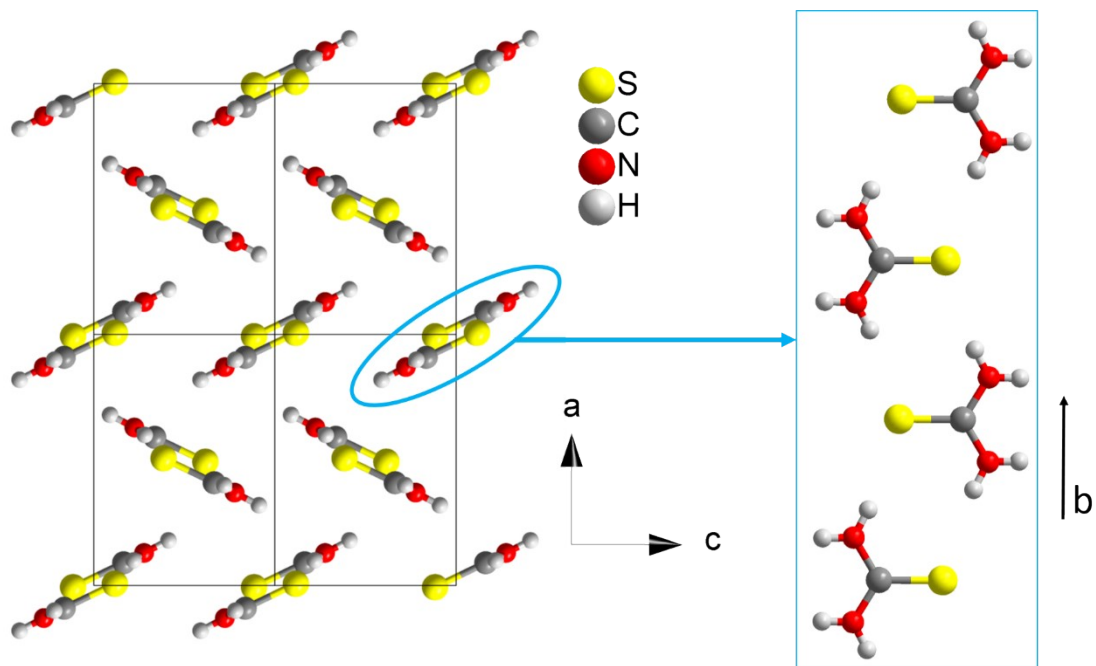

**Figure S3.** Crystal structures obtained by single-crystal x-ray diffraction at  $T = 250$  K view along  $b$ -axis (left) and detail showing alternate orientation of the thiourea molecules induced by H-bonds as observed along the  $b$ -axis.

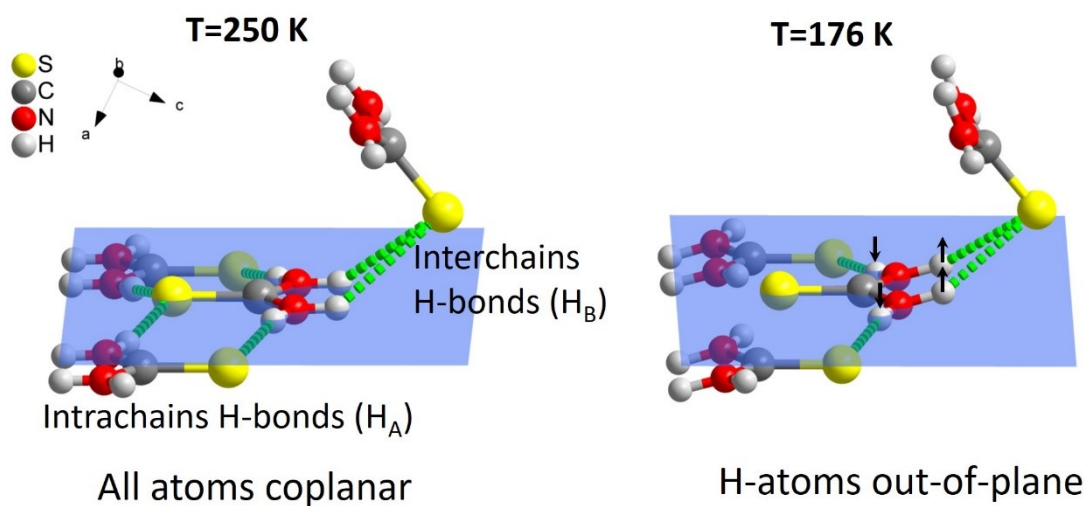

**Figure S4.** Details of the obtained crystal structure at  $T = 250$  K and  $T = 176$  K. Left image shows the two types of H-bonds: (i) intrachains H-bonds along the  $b$ -axis chains (labelled with A) and (ii) interchains H-bonds between neighbouring chains in the  $a$ - $c$  plane. Note: at 250 K (left image) all the atoms in the same  $b$ -axis chain are co-planar, while at 170 K (right image) there is a out-of-plane shift of the H-atoms responsible for the modulated phases.

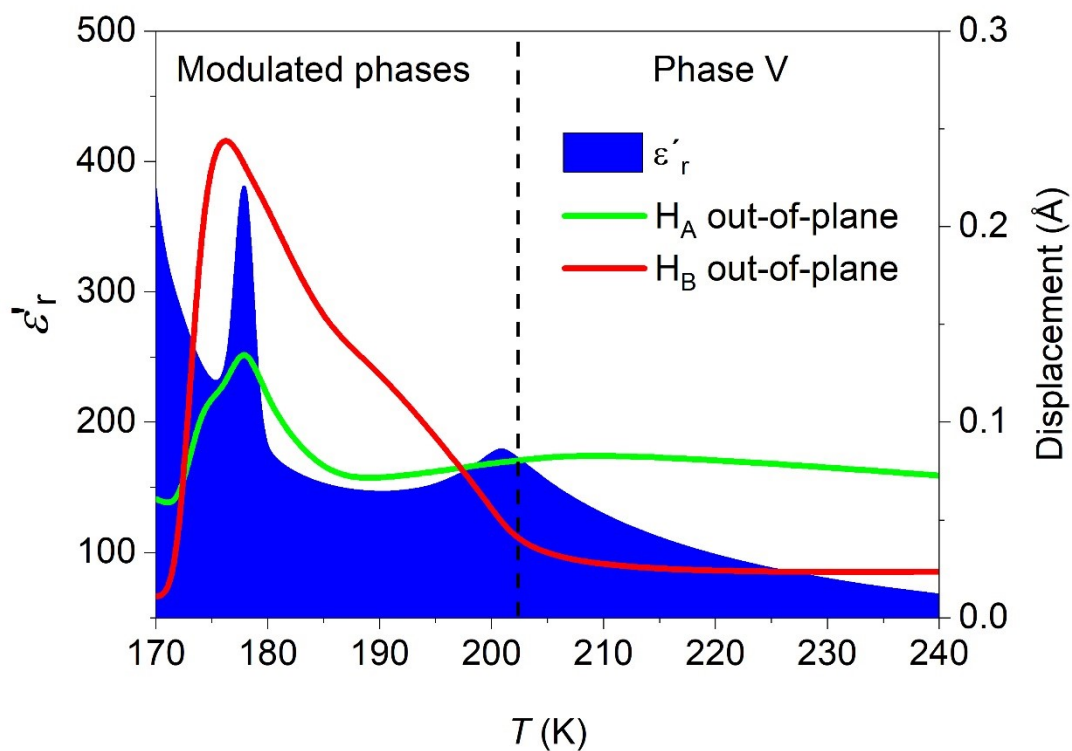

**Figure S5.** Blue curve shows the relative dielectric permittivity vs T curve of thiourea. Red and green lines show the displacement of H atoms out-of-plane versus temperature. H<sub>A</sub> atoms are involved in intrachain hydrogen bonds and H<sub>B</sub> in interchain hydrogen bonds.

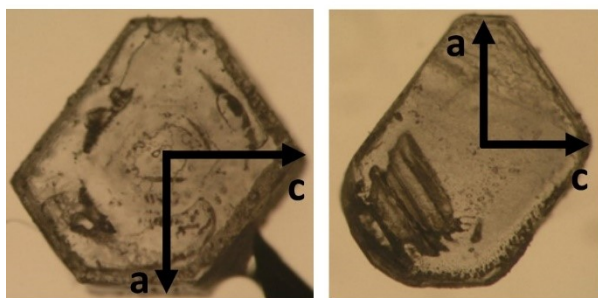

**Figure S6.** Example of hexagonal-plate shaped single crystals obtained for thiourea.

**Table S1.** Crystal data and structure refinement for Thiourea.

|                                                  |                                             |                             |                             |                             |                             |                             |                             |
|--------------------------------------------------|---------------------------------------------|-----------------------------|-----------------------------|-----------------------------|-----------------------------|-----------------------------|-----------------------------|
| Empirical formula                                | CH <sub>4</sub> N <sub>2</sub> S            |                             |                             |                             |                             |                             |                             |
| Wavelength (Å)                                   | 0.71073                                     |                             |                             |                             |                             |                             |                             |
| Crystal size (mm <sup>3</sup> )                  | 0.107 x 0.052 x 0.031                       |                             |                             |                             |                             |                             |                             |
| Formula weight                                   | 76.12                                       |                             |                             |                             |                             |                             |                             |
| F(000)                                           | 160                                         |                             |                             |                             |                             |                             |                             |
| Temperature (K)                                  | 100                                         | 130                         | 150                         | 160                         | 165                         | 170                         | 172                         |
| Crystal system                                   | Orthorhombic                                | Orthorhombic                | Orthorhombic                | Orthorhombic                | Orthorhombic                | Orthorhombic                | Orthorhombic                |
| Space group                                      | <i>P2<sub>1</sub>ma</i>                     | <i>P2<sub>1</sub>ma</i>     | <i>P2<sub>1</sub>ma</i>     | <i>P2<sub>1</sub>ma</i>     | <i>P2<sub>1</sub>ma</i>     | <i>P2<sub>1</sub>ma</i>     | <i>P2<sub>1</sub>ma</i>     |
| Unit cell dimensions (Å)                         | a = 7.4719(6)                               | a = 7.4962(6)               | a = 7.5124(7)               | a = 7.5226(7)               | a = 7.5278(7)               | a = 7.5313(6)               | a = 7.5339(5)               |
|                                                  | b = 8.5164(7)                               | b = 8.5211(7)               | b = 8.5241(8)               | b = 8.5272(8)               | b = 8.5286(8)               | b = 8.5295(7)               | b = 8.5311(6)               |
|                                                  | c = 5.4671(3)                               | c = 5.4695(4)               | c = 5.4702(4)               | c = 5.4709(4)               | c = 5.4712(4)               | c = 5.4698(3)               | c = 5.4689(3)               |
| Volume (Å <sup>3</sup> )                         | 347.89(4)                                   | 349.37(5)                   | 350.29(5)                   | 350.94(5)                   | 351.26(5)                   | 351.37(4)                   | 351.50(4)                   |
| Unit Cell refinement: # ref. [θ range (°)]       | 2481 [4.4 - 29.7]                           | 2192 [4.4 - 28.3]           | 1998 [4.4 - 28.8]           | 1910 [4.4 - 28.2]           | 1846 [4.4 - 28.2]           | 2332 [4.4 - 28.8]           | 3169 [4.4 - 30.0]           |
| Z                                                | 4                                           |                             |                             |                             |                             |                             |                             |
| Density calculated (Mg/m <sup>3</sup> )          | 1.453                                       | 1.447                       | 1.443                       | 1.441                       | 1.439                       | 1.439                       | 1.438                       |
| Absorption coefficient (mm <sup>-1</sup> )       | 0.673                                       | 0.670                       | 0.668                       | 0.667                       | 0.666                       | 0.666                       | 0.666                       |
| Tmin, Tmax                                       | 0.89, 0.98                                  | 0.89, 0.98                  | 0.89, 0.98                  | 0.89, 0.98                  | 0.89, 0.98                  | 0.90, 0.98                  | 0.93, 0.98                  |
| θ range for data collection (°)                  | 2.39 - 30.51                                | 2.39 - 30.49                | 2.39 - 30.48                | 2.39 - 30.54                | 2.39 - 30.53                | 2.39 - 30.54                | 2.39 - 30.53                |
| Index ranges                                     | -10<=h<=10<br>-12<=k<=12<br>-7<=l<=7        |                             |                             |                             |                             |                             |                             |
| Measured reflections                             | 8571                                        | 8567                        | 8612                        | 8614                        | 8614                        | 8606                        | 11666                       |
| Independent reflections                          | 1127 [R(int)=0.0665]                        | 1134 [R(int)=0.0676]        | 1133 [R(int)=0.0694]        | 1136 [R(int)=0.0736]        | 1138 [R(int)=0.0735]        | 1137 [R(int)=0.0582]        | 1137 [R(int)=0.0612]        |
| Indep. Reflections [I>2σ(I)]                     | 1027                                        | 1003                        | 981                         | 955                         | 938                         | 994                         | 1001                        |
| Completeness (%)                                 | 100                                         | 100                         | 100                         | 99.8                        | 99.8                        | 99.5                        | 99.7                        |
| Refinement method                                | Full-matrix least-squares on F <sup>2</sup> |                             |                             |                             |                             |                             |                             |
| Data / restraints / parameters                   | 1127 / 1 / 60                               | 1134 / 1 / 60               | 1133 / 1 / 60               | 1136 / 1 / 60               | 1138 / 1 / 60               | 1137 / 1 / 60               | 1137 / 1 / 60               |
| Goodness-of-fit on F <sup>2</sup>                | 1.085                                       | 1.045                       | 1.078                       | 1.080                       | 1.071                       | 1.082                       | 1.097                       |
| Final R indices [I>2σ(I)]                        | R1 = 0.0319<br>wR2 = 0.0617                 | R1 = 0.0332<br>wR2 = 0.0674 | R1 = 0.0353<br>wR2 = 0.0711 | R1 = 0.0363<br>wR2 = 0.0766 | R1 = 0.0370<br>wR2 = 0.0684 | R1 = 0.0329<br>wR2 = 0.0650 | R1 = 0.0294<br>wR2 = 0.0637 |
| R indices (all data)                             | R1 = 0.0399<br>wR2 = 0.0653                 | R1 = 0.0429<br>wR2 = 0.0731 | R1 = 0.0472<br>wR2 = 0.0770 | R1 = 0.0512<br>wR2 = 0.0854 | R1 = 0.0543<br>wR2 = 0.0786 | R1 = 0.0433<br>wR2 = 0.0706 | R1 = 0.0385<br>wR2 = 0.0683 |
| Largest diff. peak and hole (e-Å <sup>-3</sup> ) | 0.500 and -0.264                            | 0.323 and -0.311            | 0.238 and -0.248            | 0.377 and -0.257            | 0.311 and -0.291            | 0.289 and -0.258            | 0.233 and -0.255            |

**Table S1.** Crystal data and structure refinement for Thiourea (Cont.)

|                                                  |                                                 |                                                 |                                                 |                                                 |                                                 |                                                 |                                                 |
|--------------------------------------------------|-------------------------------------------------|-------------------------------------------------|-------------------------------------------------|-------------------------------------------------|-------------------------------------------------|-------------------------------------------------|-------------------------------------------------|
| Empirical formula                                | CH <sub>4</sub> N <sub>2</sub> S                |                                                 |                                                 |                                                 |                                                 |                                                 |                                                 |
| Wavelength (Å)                                   | 0.71073                                         |                                                 |                                                 |                                                 |                                                 |                                                 |                                                 |
| Crystal size (mm <sup>3</sup> )                  | 0.107 x 0.052 x 0.031                           |                                                 |                                                 |                                                 |                                                 |                                                 |                                                 |
| Formula weight                                   | 76.12                                           |                                                 |                                                 |                                                 |                                                 |                                                 |                                                 |
| F(000)                                           | 160                                             |                                                 |                                                 |                                                 |                                                 |                                                 |                                                 |
| Temperature (K)                                  | 174                                             | 176                                             | 178                                             | 180                                             | 185                                             | 190                                             | 200                                             |
| Crystal system                                   | Orthorhombic                                    |
| Space group                                      | <i>Pnma</i> *                                   |
| Unit cell dimensions (Å)                         | a = 7.5366(6)<br>b = 8.5309(7)<br>c = 5.4636(3) | a = 7.5395(6)<br>b = 8.5321(7)<br>c = 5.4642(3) | a = 7.5411(6)<br>b = 8.5319(7)<br>c = 5.4637(3) | a = 7.5433(6)<br>b = 8.5325(7)<br>c = 5.4638(3) | a = 7.5486(6)<br>b = 8.5341(7)<br>c = 5.4636(3) | a = 7.5532(6)<br>b = 8.5353(7)<br>c = 5.4633(3) | a = 7.5624(6)<br>b = 8.5355(7)<br>c = 5.4619(3) |
| Volume (Å <sup>3</sup> )                         | 351.28(4)                                       | 351.50(4)                                       | 351.53(4)                                       | 351.67(4)                                       | 351.97(4)                                       | 352.21(4)                                       | 352.56(4)                                       |
| Unit Cell refinement: # ref. [θ range (°)]       | 2770 [4.4 - 30.1]                               | 2745 [4.4 - 30.0]                               | 2736 [4.4 - 30.0]                               | 2700 [4.4 - 30.0]                               | 2626 [4.4 - 30.0]                               | 2563 [4.4 - 30.0]                               | 2545 [4.4 - 30.1]                               |
| Z                                                | 4                                               |                                                 |                                                 |                                                 |                                                 |                                                 |                                                 |
| Density calculated (Mg/m <sup>3</sup> )          | 1.439                                           | 1.438                                           | 1.438                                           | 1.438                                           | 1.437                                           | 1.436                                           | 1.434                                           |
| Absorption coefficient (mm <sup>-1</sup> )       | 0.666                                           | 0.666                                           | 0.666                                           | 0.666                                           | 0.665                                           | 0.665                                           | 0.664                                           |
| Tmin, Tmax                                       | 0.90, 0.98                                      | 0.91, 0.98                                      | 0.88, 0.98                                      | 0.89, 0.98                                      | 0.91, 0.98                                      | 0.90, 0.98                                      | 0.93, 0.98                                      |
| θ range for data collection (°)                  | 4.43 - 30.53                                    | 4.43 - 30.52                                    | 4.43 - 30.52                                    | 4.43 - 30.52                                    | 4.43 - 30.51                                    | 4.43 - 30.54                                    | 4.43 - 30.54                                    |
| Index ranges                                     | -10<=h<=10<br>-12<=k<=12<br>-7<=l<=7            |                                                 |                                                 |                                                 |                                                 |                                                 |                                                 |
| Measured reflections                             | 10993                                           | 11033                                           | 11025                                           | 11100                                           | 11165                                           | 11177                                           | 11305                                           |
| Independent reflections                          | 570 [R(int)=0.0785]                             | 570 [R(int)=0.0786]                             | 570 [R(int)=0.0778]                             | 570 [R(int)=0.0779]                             | 570 [R(int)=0.0758]                             | 571 [R(int)=0.0726]                             | 573 [R(int)=0.0667]                             |
| Indep. Reflections [I>2σ(I)]                     | 489                                             | 480                                             | 478                                             | 480                                             | 464                                             | 459                                             | 444                                             |
| Completeness (%)                                 | 99.8                                            | 99.8                                            | 99.8                                            | 99.8                                            | 99.8                                            | 99.8                                            | 99.8                                            |
| Refinement method                                | Full-matrix least-squares on F <sup>2</sup>     |                                                 |                                                 |                                                 |                                                 |                                                 |                                                 |
| Data / restraints / parameters                   | 570 / 0 / 30                                    | 570 / 0 / 30                                    | 570 / 0 / 30                                    | 570 / 0 / 30                                    | 570 / 0 / 30                                    | 571 / 0 / 30                                    | 573 / 0 / 30                                    |
| Goodness-of-fit on F <sup>2</sup>                | 1.246                                           | 1.261                                           | 1.229                                           | 1.218                                           | 1.168                                           | 1.134                                           | 1.150                                           |
| Final R indices [I>2σ(I)]                        | R1 = 0.0693<br>wR2 = 0.1312                     | R1 = 0.0647<br>wR2 = 0.1310                     | R1 = 0.0618<br>wR2 = 0.1194                     | R1 = 0.0591<br>wR2 = 0.1125                     | R1 = 0.0484<br>wR2 = 0.0924                     | R1 = 0.0400<br>wR2 = 0.0810                     | R1 = 0.0304<br>wR2 = 0.0676                     |
| R indices (all data)                             | R1 = 0.0811<br>wR2 = 0.1358                     | R1 = 0.0781<br>wR2 = 0.1360                     | R1 = 0.0741<br>wR2 = 0.1243                     | R1 = 0.0709<br>wR2 = 0.1167                     | R1 = 0.0609<br>wR2 = 0.0978                     | R1 = 0.0538<br>wR2 = 0.0861                     | R1 = 0.0461<br>wR2 = 0.0743                     |
| Largest diff. peak and hole (e-Å <sup>-3</sup> ) | 0.371 and -0.629                                | 0.409 and -0.619                                | 0.362 and -0.549                                | 0.349 and -0.504                                | 0.284 and -0.304                                | 0.273 and -0.313                                | 0.225 and -0.247                                |

\* Main averaged structure (not considering the modulation).

**Table S1.** Crystal data and structure refinement for Thiourea (Cont. 2)

|                                                  |                                             |                             |                             |
|--------------------------------------------------|---------------------------------------------|-----------------------------|-----------------------------|
| Empirical formula                                | CH <sub>4</sub> N <sub>2</sub> S            |                             |                             |
| Wavelength (Å)                                   | 0.71073                                     |                             |                             |
| Crystal size (mm <sup>3</sup> )                  | 0.107 x 0.052 x 0.031                       |                             |                             |
| Formula weight                                   | 76.12                                       |                             |                             |
| F(000)                                           | 160                                         |                             |                             |
| Temperature (K)                                  | 202                                         | 210                         | 250                         |
| Crystal system                                   | Orthorhombic                                | Orthorhombic                | Orthorhombic                |
| Space group                                      | <i>Pnma</i>                                 | <i>Pnma</i>                 | <i>Pnma</i>                 |
| Unit cell dimensions (Å)                         | a = 7.5656(6)                               | a = 7.5709(6)               | a = 7.6093(6)               |
|                                                  | b = 8.5369(7)                               | b = 8.5349(7)               | b = 8.5410(8)               |
|                                                  | c = 5.4620(3)                               | c = 5.4627(3)               | c = 5.4750(3)               |
| Volume (Å <sup>3</sup> )                         | 352.77(4)                                   | 352.98(4)                   | 355.83(5)                   |
| Unit Cell refinement: # ref. [θ range (°)]       | 2556 [4.4 - 29.4]                           | 2510 [4.4 - 30.1]           | 2156 [4.4 - 28.7]           |
| Z                                                | 4                                           |                             |                             |
| Density calculated (Mg/m <sup>3</sup> )          | 1.433                                       | 1.432                       | 1.421                       |
| Absorption coefficient (mm <sup>-1</sup> )       | 0.664                                       | 0.663                       | 0.658                       |
| Tmin, Tmax                                       | 0.93, 0.98                                  | 0.93, 0.98                  | 0.92, 0.98                  |
| θ range for data collection (°)                  | 4.43 - 30.53                                | 4.43 - 30.56                | 4.42 - 30.53                |
| Index ranges                                     | -10<=h<=10<br>-12<=k<=12<br>-7<=l<=7        |                             |                             |
| Measured reflections                             | 11343                                       | 11441                       | 11531                       |
| Independent reflections                          | 573 [R(int)=0.0646]                         | 575 [R(int)=0.0651]         | 579 [R(int)=0.0679]         |
| Indep. Reflections [I>2σ(I)]                     | 447                                         | 453                         | 422                         |
| Completeness (%)                                 | 99.8                                        | 99.7                        | 99.8                        |
| Refinement method                                | Full-matrix least-squares on F <sup>2</sup> |                             |                             |
| Data / restraints / parameters                   | 573 / 0 / 30                                | 575 / 0 / 30                | 579 / 0 / 30                |
| Goodness-of-fit on F <sup>2</sup>                | 1.110                                       | 1.079                       | 1.122                       |
| Final R indices [I>2σ(I)]                        | R1 = 0.0290<br>wR2 = 0.0671                 | R1 = 0.0286<br>wR2 = 0.0684 | R1 = 0.0325<br>wR2 = 0.0728 |
| R indices (all data)                             | R1 = 0.0416<br>wR2 = 0.0723                 | R1 = 0.0427<br>wR2 = 0.0746 | R1 = 0.0538<br>wR2 = 0.0816 |
| Largest diff. peak and hole (e-Å <sup>-3</sup> ) | 0.216 and -0.212                            | 0.181 and -0.234            | 0.197 and -0.216            |

**Table S2.** Out-of-plane hydrogen bonds intrachain and interchain distances.

| T (K) | H <sub>A</sub> intrachain distance (Å) | H <sub>B</sub> interchain distance (Å) |
|-------|----------------------------------------|----------------------------------------|
| 100   | 0.048                                  | 0.006                                  |
| 130   | 0.053                                  | 0.015                                  |
| 150   | 0.081                                  | 0.040                                  |
| 160   | 0.054                                  | 0.019                                  |
| 165   | 0.062                                  | 0.024                                  |
| 170   | 0.064                                  | 0.009                                  |
| 172   | 0.052                                  | 0.011                                  |
| 174   | 0.111                                  | 0.216                                  |
| 176   | 0.114                                  | 0.254                                  |
| 178   | 0.146                                  | 0.230                                  |
| 180   | 0.107                                  | 0.210                                  |
| 185   | 0.072                                  | 0.148                                  |
| 190   | 0.070                                  | 0.128                                  |
| 200   | 0.079                                  | 0.058                                  |
| 202   | 0.080                                  | 0.038                                  |
| 210   | 0.086                                  | 0.022                                  |
| 250   | 0.068                                  | 0.024                                  |
